# Supplementary material for: Green aqueous biphasic systems containing deep eutectic solvents and sodium salts for the extraction of protein
Source: Royal Society of Chemistry journal article supplement (doi:10.1039/c7ra07315a), 2017-01-01
Supplement: c7ra07315a1.pdf [file c7ra07315a1.pdf]

Supplementary Information

**Green aqueous biphasic systems containing deep eutectic solvents and sodium salts for the extraction of protein**

Jingyu Pang <sup>a</sup>, Xiaofang Sha <sup>b</sup>, Yanhong Chao<sup>b\*</sup>, Guangying Chen<sup>c</sup>, Changri Han<sup>c</sup>, Wenshuai Zhu<sup>d</sup>,  
Huaming Li<sup>d</sup>, Qi Zhang<sup>a, d\*</sup>

<sup>a</sup>*School of Food and Biological Engineering, Jiangsu University, Zhenjiang 212013, P. R. China.*

<sup>b</sup>*School of Pharmacy, Jiangsu University, Zhenjiang 212013, P. R. China.* <sup>c</sup>*Key Laboratory of*

*Tropical Medicinal Plant Chemistry of Education, Hainan Normal University, Haikou 571158, P.*

*R. China.* <sup>d</sup>*School of Chemistry and Chemical Engineering, Jiangsu University, Zhenjiang 212013,*

*P. R. China.*

Corresponding Email: chaoyh@ujs.edu.cn (Y. H. Chao), qzhang@ujs.edu.cn (Q. Zhang)

**Table S1** Freezing point of different molar ratio of ChCl:PEG

**Table S2** The extraction efficiencies of DES- $\text{Na}_2\text{CO}_3$  with different molar ratio of ChCl and PEG

**Table S3** Binodal curve data as the mass fraction  $w$  for the DES (1) + salt (2) +  $\text{H}_2\text{O}$  (3) systems at  $T=298\text{ K}$

**Table S1** Freezing point of different molar ratio of ChCl:PEG

| ChCl/PEG            | 0  | 1:1 | 10:1 | 20:1 | 30:1 |
|---------------------|----|-----|------|------|------|
| Freezing point (°C) | 52 | 43  | 39   | 37   | 48   |

**Table S2** The extraction efficiencies of DES- $\text{Na}_2\text{CO}_3$  with different molar ratio of  
ChCl and PEG

| E (DES- $\text{Na}_2\text{CO}_3$ ) | E <sub>1</sub> (%) | E <sub>2</sub> (%) | E <sub>3</sub> (%) | E <sub>4</sub> (%) | E <sub>5</sub> (%) |
|------------------------------------|--------------------|--------------------|--------------------|--------------------|--------------------|
| Papain                             | none               | 58.91              | 61.21              | 80.89              | 78.59              |
| Bovine serum albumin               | none               | 54.42              | 76.51              | 83.5               | 83.02              |

E: extraction efficiency. E<sub>1</sub>: ChCl/PEG=0; E<sub>2</sub>: ChCl/PEG=1; E<sub>3</sub>: ChCl/PEG=10; E<sub>4</sub>: ChCl/PEG=20;  
E<sub>5</sub>: ChCl/PEG=30.

**Table S3** Binodal curve data as the mass fraction  $w$  for the DES (1) + salt (2) + H<sub>2</sub>O

(3) systems at T=298 K

| $100w_1$                                                                                  | $100w_2$ | $100w_1$ | $100w_2$ | $100w_1$ | $100w_2$ | $100w_1$ | $100w_2$ | $100w_1$ | $100w_2$ |
|-------------------------------------------------------------------------------------------|----------|----------|----------|----------|----------|----------|----------|----------|----------|
| DES+Na <sub>3</sub> C <sub>6</sub> O <sub>5</sub> H <sub>7</sub> +H <sub>2</sub> O system |          |          |          |          |          |          |          |          |          |
| 3.65                                                                                      | 40.53    | 8.62     | 22.69    | 11.33    | 16.20    | 13.00    | 12.33    |          |          |
| 4.31                                                                                      | 35.30    | 8.75     | 21.97    | 11.51    | 15.65    | 13.21    | 11.95    |          |          |
| 5.49                                                                                      | 31.84    | 9.13     | 20.98    | 11.92    | 14.96    | 13.56    | 11.58    |          |          |
| 6.41                                                                                      | 29.05    | 9.63     | 20.09    | 12.12    | 14.50    |          |          |          |          |
| 6.70                                                                                      | 27.76    | 9.78     | 19.65    | 12.30    | 14.17    |          |          |          |          |
| 7.05                                                                                      | 26.03    | 10.25    | 18.36    | 12.68    | 13.52    |          |          |          |          |
| 8.12                                                                                      | 23.94    | 10.68    | 17.60    | 12.81    | 13.19    |          |          |          |          |
| 8.31                                                                                      | 23.42    | 11.09    | 16.80    | 12.94    | 12.81    |          |          |          |          |
| DES+NaH <sub>2</sub> PO <sub>4</sub> +H <sub>2</sub> O system                             |          |          |          |          |          |          |          |          |          |
| 6.34                                                                                      | 37.89    | 8.55     | 30.94    | 10.23    | 26.62    | 14.34    | 18.21    | 18.14    | 11.70    |
| 6.89                                                                                      | 36.06    | 8.75     | 30.35    | 10.82    | 25.31    | 14.84    | 17.08    | 18.44    | 11.09    |
| 7.20                                                                                      | 35.07    | 8.90     | 29.95    | 11.31    | 24.12    | 15.57    | 15.94    | 18.81    | 10.60    |
| 7.41                                                                                      | 34.21    | 9.17     | 29.28    | 11.72    | 23.37    | 16.17    | 14.95    | 19.19    | 10.00    |
| 7.64                                                                                      | 33.45    | 9.38     | 28.57    | 12.24    | 22.19    | 16.62    | 14.11    | 20.33    | 8.22     |
| 7.85                                                                                      | 32.62    | 9.74     | 27.95    | 12.64    | 21.30    | 16.88    | 13.62    |          |          |
| 8.19                                                                                      | 32.08    | 9.84     | 27.55    | 13.01    | 20.69    | 17.38    | 12.93    |          |          |
| 8.37                                                                                      | 31.38    | 10.10    | 27.02    | 13.80    | 19.23    | 17.79    | 12.28    |          |          |
| DES+Na <sub>2</sub> CO <sub>3</sub> +H <sub>2</sub> O system                              |          |          |          |          |          |          |          |          |          |
| 1.64                                                                                      | 40.44    | 2.37     | 33.45    | 3.30     | 25.87    | 4.44     | 18.88    |          |          |
| 1.82                                                                                      | 38.96    | 2.47     | 32.36    | 3.37     | 25.36    | 4.57     | 17.87    |          |          |
| 1.93                                                                                      | 37.97    | 2.52     | 31.26    | 3.46     | 24.74    |          |          |          |          |
| 2.05                                                                                      | 36.49    | 2.73     | 30.19    | 3.56     | 23.99    |          |          |          |          |
| 2.17                                                                                      | 35.53    | 2.82     | 29.59    | 3.74     | 22.92    |          |          |          |          |
| 2.22                                                                                      | 34.89    | 2.90     | 28.96    | 3.96     | 21.45    |          |          |          |          |
| 2.26                                                                                      | 34.40    | 2.98     | 28.36    | 4.10     | 20.81    |          |          |          |          |
| 2.32                                                                                      | 33.88    | 3.17     | 26.78    | 4.24     | 19.87    |          |          |          |          |
